# Supplementary material for: GWAS and colocalization analyses implicate carotid intima-media thickness and carotid plaque loci in cardiovascular outcomes
Source: Springer Nature journal article supplement (doi:10.1038/s41467-018-07340-5), 2018-11-27
Supplement: MOESM3 [file 41467_2018_7340_MOESM3_ESM.xlsx]

## Sheet: Supplementary Data 1
Supplementary Data 1. Colocalization results between tissue-specific eQTLs of five genes (CCDC71L, PRKAR2B, ADAMTS9, LOXL4) with CHD and stroke (coloc) .
Gene.name	eQTLTissue	GWAS	EnsemblID	CHR	START	STOP	nsnps	PP0	PP1	PP2	PP3	PP4	best.snp	best.snp.PPA	minpi	minpi.snp
KIAA1462	MAM	CARDIoGRAMplusC4D	ENSG00000165757	10	29325616	31325032	6275	2.88e-36	3.07e-06	1.05e-31	0.102637	0.89736	10:30323892	0.9	3e-35,4.41e-11	10:30317073,10:30323892
CCDC71L	AOR	LAS	ENSG00000253276	7	105299372	107298840	3931	4.09e-33	0.608308	6.49e-34	0.0936406	0.298052	rs17477177	0.3	2.37e-37,0.000362	rs12705390,rs17398575
ADAMTS9	AOR	AS	ENSG00000163638	3	63588304	65587494	4429	1.77e-19	0.553766	5.27e-20	0.162415	0.283819	rs17676309	0.28	2.06e-25,1.11e-05	rs17676309,rs28546794
ADAMTS9-AS1	AOR	AS	ENSG00000241158	3	63561280	65561009	4425	6.11e-09	0.557092	1.82e-09	0.163079	0.279829	rs17676309	0.28	4.03e-15,1.11e-05	rs17676309,rs28546794
KIAA1462	AOR	CARDIoGRAMplusC4D_REC	ENSG00000165757	10	29325616	31325032	6246	6.49e-27	0.00126136	3.78e-24	0.732908	0.26583	10:30327735	0.27	7.63e-30,1.54e-08	10:30323189,10:30334804
CCDC71L	MAM	LAS	ENSG00000253276	7	105299372	107298840	3931	9.88e-29	0.649435	1.57e-29	0.100655	0.24991	rs17477177	0.25	1.17e-33,0.000362	rs12705390,rs17398575
ADAMTS9	MAM	AS	ENSG00000163638	3	63588304	65587494	4429	5.59e-18	0.589965	1.67e-18	0.173692	0.236343	rs17676309	0.24	7.48e-24,1.11e-05	rs6775974,rs28546794
PRKAR2B	MAM	LAS	ENSG00000005249	7	105745093	107743409	3700	0.00512656	0.686972	0.000742969	0.0974628	0.209696	rs17477177	0.21	2.33e-08,0.000362	rs12705390,rs17398575
PRKAR2B	AOR	LAS	ENSG00000005249	7	105745093	107743409	3700	0.0560082	0.64109	0.00811702	0.0908712	0.203913	rs17398575	0.2	6.12e-07,0.000362	rs12705390,rs17398575
ADAMTS9	AOR	IS	ENSG00000163638	3	63588304	65587494	4427	2.24e-19	0.702166	3.7e-20	0.114253	0.183581	rs17676309	0.18	2.06e-25,4.22e-05	rs17676309,rs28546794
LOXL4	AOR	CARDIoGRAMplusC4D	ENSG00000138131	10	99017729	101017321	3947	0.00178612	0.693825	0.00031814	0.121759	0.182312	10:100011077	0.18	5.12e-08,0.000135	10:99937526,10:100011077
ADAMTS9-AS1	AOR	IS	ENSG00000241158	3	63561280	65561009	4423	7.75e-09	0.707408	1.28e-09	0.114741	0.177851	rs17676309	0.18	4.03e-15,4.22e-05	rs17676309,rs28546794
KIAA1462	AOR	CARDIoGRAMplusC4D	ENSG00000165757	10	29325616	31325032	6275	1.18e-28	2.31e-05	4.28e-24	0.837649	0.162328	10:30323189	0.16	7.63e-30,4.41e-11	10:30323189,10:30323892
ADAMTS9-AS1	MAM	AS	ENSG00000241158	3	63561280	65561009	4425	3.72e-12	0.650694	1.11e-12	0.192176	0.15713	rs9864077	0.16	4.89e-18,1.11e-05	rs9864077,rs28546794
ADAMTS9	MAM	IS	ENSG00000163638	3	63588304	65587494	4427	6.97e-18	0.735617	1.15e-18	0.120178	0.144205	rs17676309	0.14	7.48e-24,4.22e-05	rs6775974,rs28546794
ADAMTS9	MAM	LAS	ENSG00000163638	3	63588304	65587494	4431	6.93e-18	0.731091	1.81e-18	0.190406	0.0785035	rs6775974	0.079	7.48e-24,0.00055	rs6775974,rs13100017
ADAMTS9-AS1	AOR	LAS	ENSG00000241158	3	63561280	65561009	4427	8.11e-09	0.739549	2.04e-09	0.185462	0.0749889	rs17676309	0.075	4.03e-15,0.00055	rs17676309,rs13100017
LOXL4	AOR	SVD	ENSG00000138131	10	99017729	101017321	3594	0.00187861	0.723893	0.000520531	0.19984	0.073868	rs55917128	0.074	5.12e-08,0.000772	rs9420722,rs12259756
ADAMTS9	AOR	LAS	ENSG00000163638	3	63588304	65587494	4431	2.35e-19	0.736705	6.14e-20	0.191945	0.0713503	rs17676309	0.071	2.06e-25,0.00055	rs17676309,rs13100017
CCDC71L	AOR	AS	ENSG00000253276	7	105299372	107298840	3901	5.86e-33	0.872584	4.5e-34	0.0663521	0.0610641	rs12705390	0.061	2.37e-37,0.000689	rs12705390,rs35301188
ADAMTS9-AS1	MAM	CE	ENSG00000241158	3	63561280	65561009	4429	4.65e-12	0.814695	7.29e-13	0.127081	0.0582239	rs4422297	0.058	4.89e-18,0.000286	rs9864077,rs9877097
ADAMTS9	SF	AS	ENSG00000163638	3	63588304	65587494	4429	0.0295677	0.697751	0.00882349	0.207658	0.0561991	rs9870322	0.056	2.42e-07,1.11e-05	rs34401181,rs28546794
PRKAR2B	AOR	IS	ENSG00000005249	7	105745093	107743409	3674	0.0706117	0.807941	0.00556071	0.0630979	0.0527891	rs35301188	0.053	6.12e-07,0.000171	rs12705390,rs35301188
CCDC71L	MAM	AS	ENSG00000253276	7	105299372	107298840	3901	1.34e-28	0.882114	1.03e-29	0.0671871	0.0506984	rs12705390	0.051	1.17e-33,0.000689	rs12705390,rs35301188
PRKAR2B	MAM	AS	ENSG00000005249	7	105745093	107743409	3671	0.00660663	0.885272	0.000493178	0.065665	0.0419635	rs12705390	0.042	2.33e-08,0.000689	rs12705390,rs35301188
PRKAR2B	AOR	AS	ENSG00000005249	7	105745093	107743409	3671	0.0718607	0.822219	0.00536433	0.0609821	0.0395734	rs12705390	0.04	6.12e-07,0.000689	rs12705390,rs35301188
PRKAR2B	MAM	IS	ENSG00000005249	7	105745093	107743409	3674	0.00661133	0.885895	0.000520646	0.0693889	0.037584	rs35301188	0.038	2.33e-08,0.000171	rs12705390,rs35301188
ADAMTS9-AS1	MAM	LAS	ENSG00000241158	3	63561280	65561009	4427	4.39e-12	0.769341	1.11e-12	0.19334	0.037319	rs4422297	0.037	4.89e-18,0.00055	rs9864077,rs13100017
CCDC71L	MAM	IS	ENSG00000253276	7	105299372	107298840	3903	1.37e-28	0.89923	1.1e-29	0.0718085	0.028961	rs17477177	0.029	1.17e-33,0.000171	rs12705390,rs35301188
CCDC71L	AOR	IS	ENSG00000253276	7	105299372	107298840	3903	6.04e-33	0.899444	4.84e-34	0.0718279	0.0287284	rs17477177	0.029	2.37e-37,0.000171	rs12705390,rs35301188
ADAMTS9-AS1	MAM	IS	ENSG00000241158	3	63561280	65561009	4423	4.77e-12	0.834909	7.85e-13	0.137242	0.0278489	rs9864077	0.028	4.89e-18,4.22e-05	rs9864077,rs28546794
ADAMTS9	SF	CE	ENSG00000163638	3	63588304	65587494	4433	0.0343551	0.810989	0.00538264	0.126839	0.0224351	rs34401181	0.022	2.42e-07,0.000286	rs34401181,rs9877097
ADAMTS9	AOR	CE	ENSG00000163638	3	63588304	65587494	4433	2.7e-19	0.848291	4.24e-20	0.132717	0.0189918	rs17676309	0.019	2.06e-25,0.000286	rs17676309,rs9877097
ADAMTS9-AS1	AOR	CE	ENSG00000241158	3	63561280	65561009	4429	9.3e-09	0.848653	1.46e-09	0.132799	0.0185486	rs17676309	0.019	4.03e-15,0.000286	rs17676309,rs9877097
ADAMTS9	MAM	CE	ENSG00000163638	3	63588304	65587494	4433	8.04e-18	0.848943	1.26e-18	0.132827	0.0182303	rs6775974	0.018	7.48e-24,0.000286	rs6775974,rs9877097
LOXL4	AOR	CARDIoGRAMplusC4D_REC	ENSG00000138131	10	99017729	101017321	3926	0.00203071	0.788584	0.000491672	0.190749	0.0181451	10:100011077	0.018	5.12e-08,8.21e-05	10:99937526,10:99772190
ADAMTS9	SF	LAS	ENSG00000163638	3	63588304	65587494	4431	0.031671	0.747469	0.0082824	0.195301	0.017277	rs4132228	0.017	2.42e-07,0.00055	rs34401181,rs13100017
KIAA1462	MAM	LAS	ENSG00000165757	10	29325616	31325032	5699	6.7e-31	0.690101	2.86e-31	0.2939	0.0159987	rs2478835	0.016	3e-35,0.000523	rs9337951,rs3006543
KIAA1462	AOR	IS	ENSG00000165757	10	29325616	31325032	5693	4.06e-24	0.774725	1.1e-24	0.210386	0.0148893	rs2066334	0.015	7.63e-30,0.000366	rs2066334,rs10430570
KIAA1462	SKLM	CARDIoGRAMplusC4D	ENSG00000165757	10	29325616	31325032	6275	1.81e-05	9.05e-06	0.65782	0.32889	0.0132626	10:30323892	0.013	5.44e-05,4.41e-11	10:29641525,10:30323892
ADAMTS9	SF	IS	ENSG00000163638	3	63588304	65587494	4427	0.0344977	0.814227	0.00570351	0.134506	0.0110659	rs9870322	0.011	2.42e-07,4.22e-05	rs34401181,rs28546794
KIAA1462	MAM	IS	ENSG00000165757	10	29325616	31325032	5693	7.56e-31	0.777918	2.05e-31	0.211294	0.0107873	rs2478835	0.011	3e-35,0.000366	rs9337951,rs10430570
KIAA1462	AOR	AS	ENSG00000165757	10	29325616	31325032	5680	3.53e-24	0.672527	1.67e-24	0.317185	0.010288	rs11007869	0.01	7.63e-30,8e-05	rs2066334,rs7085041
KIAA1462	LIV	AS	ENSG00000165757	10	29325616	31325032	5680	0.111018	0.563424	0.0523767	0.26574	0.0074406	rs2462015	0.0074	6.26e-06,8e-05	rs2488016,rs7085041
KIAA1462	AOR	LAS	ENSG00000165757	10	29325616	31325032	5699	3.65e-24	0.696425	1.55e-24	0.296686	0.00688945	rs2066334	0.0069	7.63e-30,0.000523	rs2066334,rs3006543
KIAA1462	MAM	AS	ENSG00000165757	10	29325616	31325032	5680	6.57e-31	0.675081	3.1e-31	0.318428	0.00649146	rs2478835	0.0065	3e-35,8e-05	rs9337951,rs7085041
KIAA1462	MAM	CARDIoGRAMplusC4D_REC	ENSG00000165757	10	29325616	31325032	6246	1.61e-33	0.00170155	9.38e-31	0.992201	0.00609707	10:30322878	0.0061	3e-35,1.54e-08	10:30317073,10:30334804
KIAA1462	LIV	IS	ENSG00000165757	10	29325616	31325032	5693	0.128619	0.653044	0.0349526	0.177408	0.00597727	rs2091084	0.006	6.26e-06,0.000366	rs2488016,rs10430570
LOXL4	AOR	AS	ENSG00000138131	10	99017729	101017321	3598	0.00244611	0.942584	0.000127309	0.0489988	0.00584411	rs10736126	0.0058	5.12e-08,0.0011	rs9420722,rs56354111
LOXL4	AOR	IS	ENSG00000138131	10	99017729	101017321	3596	0.00242925	0.93608	0.000144829	0.0557523	0.00559388	rs10736126	0.0056	5.12e-08,0.00127	rs9420722,rs56354111
PRKAR2B	SF	CARDIoGRAMplusC4D	ENSG00000005249	7	105745093	107743409	4045	0.17236	0.051909	0.592201	0.178299	0.00523116	7:107288677	0.0052	0.00283,6.26e-06	7:106055635,7:107259721
CCDC71L	SKLM	CARDIoGRAMplusC4D	ENSG00000253276	7	105299372	107298840	4300	0.171617	0.052503	0.590505	0.180606	0.00476835	7:107288677	0.0048	0.00608,6.26e-06	7:106261335,7:107259721
PRKAR2B	Blood	CARDIoGRAMplusC4D	ENSG00000005249	7	105745093	107743409	4045	0.169765	0.0546227	0.583286	0.187628	0.00469885	7:107259721	0.0047	0.0023,6.26e-06	7:106662841,7:107259721
KIAA1462	SKLM	CARDIoGRAMplusC4D_REC	ENSG00000165757	10	29325616	31325032	6246	0.00113796	0.000566252	0.663603	0.330166	0.00452712	10:30327735	0.0045	5.44e-05,1.54e-08	10:29641525,10:30334804
KIAA1462	SF	AS	ENSG00000165757	10	29325616	31325032	5680	0.269687	0.406876	0.127234	0.191915	0.00428736	rs2505108	0.0043	1.69e-05,8e-05	rs538396,rs7085041
LOXL4	SF	CARDIoGRAMplusC4D_REC	ENSG00000138131	10	99017729	101017321	3926	0.0606038	0.741122	0.0146733	0.179397	0.00420381	10:99157571	0.0042	4.4e-06,8.21e-05	10:99157571,10:99772190
ADAMTS9-AS1	SF	SVD	ENSG00000241158	3	63561280	65561009	4427	7.24e-05	0.841513	1.33e-05	0.154334	0.0040673	rs7615657	0.0041	2e-10,0.000397	rs7615657,rs986150
CCDC71L	Blood	CARDIoGRAMplusC4D	ENSG00000253276	7	105299372	107298840	4300	0.163906	0.0603829	0.563972	0.207727	0.00401177	7:107288677	0.004	0.00261,6.26e-06	7:105473360,7:107259721
LOXL4	SKLM	IS	ENSG00000138131	10	99017729	101017321	3596	3.07e-16	0.940063	1.83e-17	0.0560064	0.00393079	rs61875312	0.0039	3.65e-22,0.00127	rs61875312,rs56354111
ADAMTS9-AS1	SF	LAS	ENSG00000241158	3	63561280	65561009	4427	6.85e-05	0.795806	1.72e-05	0.200339	0.00376886	rs4688481	0.0038	2e-10,0.00055	rs7615657,rs13100017
KIAA1462	SF	IS	ENSG00000165757	10	29325616	31325032	5693	0.312161	0.471487	0.0848311	0.128094	0.00342687	rs2798917	0.0034	1.69e-05,0.000366	rs538396,rs10430570
PRKAR2B	SKLM	CARDIoGRAMplusC4D	ENSG00000005249	7	105745093	107743409	4045	0.168429	0.0562494	0.578696	0.19323	0.00339502	7:107288677	0.0034	0.000115,6.26e-06	7:105773504,7:107259721
LOXL4	SF	SVD	ENSG00000138131	10	99017729	101017321	3594	0.0635762	0.716899	0.0176159	0.198608	0.00330098	rs7916665	0.0033	7.06e-06,0.000772	rs7916665,rs12259756
CCDC71L	AOR	SVD	ENSG00000253276	7	105299372	107298840	3899	5.67e-33	0.843492	1.03e-33	0.153448	0.00305965	rs17477177	0.0031	2.37e-37,0.000762	rs12705390,rs80330319
CCDC71L	MAM	SVD	ENSG00000253276	7	105299372	107298840	3899	1.28e-28	0.843746	2.34e-29	0.153498	0.00275656	rs17477177	0.0028	1.17e-33,0.000762	rs12705390,rs80330319
ADAMTS9-AS1	AOR	SVD	ENSG00000241158	3	63561280	65561009	4427	9.24e-09	0.842714	1.69e-09	0.154567	0.00271807	rs17676309	0.0027	4.03e-15,0.000397	rs17676309,rs986150
ADAMTS9	AOR	SVD	ENSG00000163638	3	63588304	65587494	4431	2.69e-19	0.842302	4.95e-20	0.154996	0.00270128	rs17676309	0.0027	2.06e-25,0.000397	rs17676309,rs986150
PRKAR2B	AOR	SVD	ENSG00000005249	7	105745093	107743409	3674	0.0668727	0.765146	0.0132921	0.15206	0.00262905	rs17398575	0.0026	6.12e-07,0.000762	rs12705390,rs80330319
PRKAR2B	MAM	SVD	ENSG00000005249	7	105745093	107743409	3674	0.00616398	0.825931	0.0012252	0.164143	0.00253693	rs17477177	0.0025	2.33e-08,0.000762	rs12705390,rs80330319
PRKAR2B	SKLM	CE	ENSG00000005249	7	105745093	107743409	3692	0.65146	0.196539	0.114845	0.0346222	0.00253425	rs77209493	0.0025	0.000522,0.00151	rs2395858,rs77209493
LOXL4	MAM	CARDIoGRAMplusC4D	ENSG00000138131	10	99017729	101017321	3947	0.622465	0.22426	0.110872	0.0399196	0.00248428	10:100011077	0.0025	0.00114,0.000135	10:99640651,10:100011077
ADAMTS9	MAM	SVD	ENSG00000163638	3	63588304	65587494	4431	7.98e-18	0.842555	1.47e-18	0.155046	0.00239896	rs6775974	0.0024	7.48e-24,0.000397	rs6775974,rs986150
ADAMTS9	SF	CARDIoGRAMplusC4D	ENSG00000163638	3	63588304	65587494	4882	0.0334786	0.889551	0.00271422	0.0720973	0.00215857	3:64703665	0.0022	2.42e-07,0.00141	3:64722297,3:63959704
ADAMTS9	SF	CARDIoGRAMplusC4D_REC	ENSG00000163638	3	63588304	65587494	4875	0.0278502	0.739704	0.00835954	0.22201	0.00207643	3:64727086	0.0021	2.42e-07,3.46e-05	3:64722297,3:64795689
CCDC71L	AOR	CE	ENSG00000253276	7	105299372	107298840	3921	5.59e-33	0.832234	1.11e-33	0.165749	0.00201737	rs12705390	0.002	2.37e-37,0.000873	rs12705390,rs2528897
PRKAR2B	MAM	CARDIoGRAMplusC4D_REC	ENSG00000005249	7	105745093	107743409	4025	0.00622485	0.838557	0.00112909	0.152081	0.00200861	7:106414069	0.002	2.33e-08,0.00195	7:106410777,7:106069830
LOXL4	MAM	SVD	ENSG00000138131	10	99017729	101017321	3594	0.588998	0.192485	0.163201	0.0533143	0.00200157	rs7090035	0.002	0.00114,0.000772	rs10786376,rs12259756
KIAA1462	SF	CARDIoGRAMplusC4D_REC	ENSG00000165757	10	29325616	31325032	6246	0.000650674	0.00105792	0.379441	0.616911	0.00193915	10:30327735	0.0019	1.69e-05,1.54e-08	10:30441478,10:30334804
CCDC71L	MAM	CARDIoGRAMplusC4D_REC	ENSG00000253276	7	105299372	107298840	4282	1.24e-28	0.835655	2.4e-29	0.162413	0.00193228	7:106414069	0.0019	1.17e-33,0.00195	7:106410777,7:106069830
PRKAR2B	AOR	CARDIoGRAMplusC4D_REC	ENSG00000005249	7	105745093	107743409	4025	0.0674579	0.777389	0.0122358	0.140987	0.00193058	7:106416467	0.0019	6.12e-07,0.00195	7:106410777,7:106069830
ADAMTS9-AS1	SF	CE	ENSG00000241158	3	63561280	65561009	4429	7.42e-05	0.862825	1.16e-05	0.135186	0.00190302	rs7615657	0.0019	2e-10,0.000286	rs7615657,rs9877097
LOXL4	SF	LAS	ENSG00000138131	10	99017729	101017321	3600	0.0740788	0.835394	0.00722112	0.0814143	0.00189209	rs11812223	0.0019	7.06e-06,0.00333	rs7916665,rs72835944
LOXL4	SKLM	AS	ENSG00000138131	10	99017729	101017321	3598	3.1e-16	0.948796	1.61e-17	0.0493621	0.00184232	rs61875312	0.0018	3.65e-22,0.0011	rs61875312,rs56354111
CCDC71L	MAM	CE	ENSG00000253276	7	105299372	107298840	3921	1.27e-28	0.832404	2.52e-29	0.165785	0.00181155	rs12705390	0.0018	1.17e-33,0.000873	rs12705390,rs2528897
PRKAR2B	MAM	CE	ENSG00000005249	7	105745093	107743409	3692	0.00628588	0.842323	0.00110813	0.148474	0.00180924	rs12705390	0.0018	2.33e-08,0.00151	rs12705390,rs77209493
LOXL4	SKLM	CE	ENSG00000138131	10	99017729	101017321	3603	2.99e-16	0.917507	2.64e-17	0.0807406	0.00175201	rs7080971	0.0018	3.65e-22,0.00316	rs61875312,rs74931036
CCDC71L	AOR	CARDIoGRAMplusC4D_REC	ENSG00000253276	7	105299372	107298840	4282	5.43e-33	0.835811	1.06e-33	0.162445	0.00174464	7:106411858	0.0017	2.37e-37,0.00195	7:106410777,7:106069830
KIAA1462	SF	CARDIoGRAMplusC4D	ENSG00000165757	10	29325616	31325032	6275	1.04e-05	1.7e-05	0.379168	0.619081	0.00172375	10:30323892	0.0017	1.69e-05,4.41e-11	10:30441478,10:30323892
KIAA1462	AOR	CE	ENSG00000165757	10	29325616	31325032	5705	4.13e-24	0.78911	1.1e-24	0.209188	0.00170273	rs2066334	0.0017	7.63e-30,0.000438	rs2066334,rs406896
PRKAR2B	AOR	CE	ENSG00000005249	7	105745093	107743409	3692	0.0681989	0.780509	0.0120227	0.137578	0.00169151	rs12705390	0.0017	6.12e-07,0.00151	rs12705390,rs77209493
KIAA1462	MAM	CE	ENSG00000165757	10	29325616	31325032	5705	7.66e-31	0.78912	2.03e-31	0.209191	0.00168986	rs2478835	0.0017	3e-35,0.000438	rs9337951,rs406896
LOXL4	MAM	CARDIoGRAMplusC4D_REC	ENSG00000138131	10	99017729	101017321	3926	0.59193	0.211827	0.143317	0.0512708	0.00165498	10:99772190	0.0017	0.00114,8.21e-05	10:99640651,10:99772190
KIAA1462	SKLM	CE	ENSG00000165757	10	29325616	31325032	5705	0.54155	0.247603	0.143573	0.0656267	0.00164738	rs2768672	0.0016	5.44e-05,0.000438	rs2768672,rs406896
KIAA1462	SKLM	AS	ENSG00000165757	10	29325616	31325032	5680	0.466113	0.21224	0.219905	0.100115	0.00162605	rs184043657	0.0016	5.44e-05,8e-05	rs2768672,rs7085041
LOXL4	SKLM	CARDIoGRAMplusC4D	ENSG00000138131	10	99017729	101017321	3947	2.34e-16	0.847448	4.17e-17	0.150929	0.00162301	10:100025361	0.0016	3.65e-22,0.000135	10:100029202,10:100011077
PRKAR2B	LIV	SVD	ENSG00000005249	7	105745093	107743409	3674	0.431767	0.40118	0.0858215	0.0797267	0.00150447	rs17341680	0.0015	2.48e-05,0.000762	rs74620117,rs80330319
KIAA1462	SF	LAS	ENSG00000165757	10	29325616	31325032	5699	0.278864	0.421317	0.118827	0.179513	0.00147888	rs2798917	0.0015	1.69e-05,0.000523	rs538396,rs3006543
KIAA1462	SKLM	LAS	ENSG00000165757	10	29325616	31325032	5699	0.480597	0.219593	0.204788	0.0935562	0.00146591	rs3006543	0.0015	5.44e-05,0.000523	rs2768672,rs3006543
LOXL4	SKLM	CARDIoGRAMplusC4D_REC	ENSG00000138131	10	99017729	101017321	3926	2.23e-16	0.80392	5.39e-17	0.194629	0.00145017	10:100029202	0.0015	3.65e-22,8.21e-05	10:100029202,10:99772190
ADAMTS9	SKLM	CARDIoGRAMplusC4D_REC	ENSG00000163638	3	63588304	65587494	4875	0.461198	0.306851	0.138434	0.0920906	0.0014264	3:64795689	0.0014	0.000232,3.46e-05	3:63713539,3:64795689
LOXL4	SKLM	LAS	ENSG00000138131	10	99017729	101017321	3600	2.97e-16	0.909898	2.9e-17	0.0886816	0.00142038	rs61875312	0.0014	3.65e-22,0.00333	rs61875312,rs72835944
PRKAR2B	LIV	LAS	ENSG00000005249	7	105745093	107743409	3700	0.451361	0.420841	0.0654137	0.0609765	0.00140788	rs17398575	0.0014	2.48e-05,0.000362	rs74620117,rs17398575
CCDC71L	Blood	CE	ENSG00000253276	7	105299372	107298840	3921	0.623436	0.209311	0.12418	0.0416779	0.00139574	rs10808149	0.0014	0.00261,0.000873	rs4292623,rs2528897
PRKAR2B	SKLM	SVD	ENSG00000005249	7	105745093	107743409	3674	0.640595	0.192453	0.12733	0.0382397	0.00138278	rs80330319	0.0014	0.000522,0.000762	rs2395858,rs80330319
ADAMTS9	SF	SVD	ENSG00000163638	3	63588304	65587494	4431	0.034285	0.809135	0.00631006	0.148905	0.00136478	rs34401181	0.0014	2.42e-07,0.000397	rs34401181,rs986150
ADAMTS9	SKLM	SVD	ENSG00000163638	3	63588304	65587494	4431	0.526689	0.316734	0.0969356	0.0582804	0.0013604	rs62253780	0.0014	0.000232,0.000397	rs62253780,rs986150
ADAMTS9	SKLM	AS	ENSG00000163638	3	63588304	65587494	4429	0.480399	0.28876	0.143359	0.0861576	0.00132416	rs28546794	0.0013	0.000232,1.11e-05	rs62253780,rs28546794
ADAMTS9-AS1	MAM	SVD	ENSG00000241158	3	63561280	65561009	4427	4.82e-12	0.843897	8.84e-13	0.154798	0.001305	rs9864077	0.0013	4.89e-18,0.000397	rs9864077,rs986150
LOXL4	SKLM	SVD	ENSG00000138131	10	99017729	101017321	3594	2.55e-16	0.782025	7.07e-17	0.216673	0.0013025	rs61875312	0.0013	3.65e-22,0.000772	rs61875312,rs12259756
KIAA1462	LIV	LAS	ENSG00000165757	10	29325616	31325032	5699	0.115221	0.585106	0.0490971	0.249307	0.00126863	rs2488016	0.0013	6.26e-06,0.000523	rs2488016,rs3006543
KIAA1462	SF	SVD	ENSG00000165757	10	29325616	31325032	5658	0.327952	0.493477	0.0707931	0.106511	0.00126602	rs573188	0.0013	1.69e-05,0.000155	rs538396,rs573188
KIAA1462	SF	CE	ENSG00000165757	10	29325616	31325032	5705	0.314382	0.475074	0.0833475	0.125937	0.00126015	rs2798917	0.0013	1.69e-05,0.000438	rs538396,rs406896
CCDC71L	SF	SVD	ENSG00000253276	7	105299372	107298840	3899	0.180473	0.664539	0.0328382	0.120905	0.00124512	rs41813	0.0012	1.47e-06,0.000762	rs41813,rs80330319
ADAMTS9	SKLM	LAS	ENSG00000163638	3	63588304	65587494	4431	0.494424	0.297304	0.129299	0.0777367	0.00123732	rs7647017	0.0012	0.000232,0.00055	rs62253780,rs13100017
LOXL4	AOR	LAS	ENSG00000138131	10	99017729	101017321	3600	0.00235565	0.907731	0.000229626	0.0884725	0.0012114	rs9420722	0.0012	5.12e-08,0.00333	rs9420722,rs72835944
CCDC71L	SF	LAS	ENSG00000253276	7	105299372	107298840	3931	0.183956	0.677944	0.0292188	0.10767	0.00121134	rs41813	0.0012	1.47e-06,0.000362	rs41813,rs17398575
LOXL4	LIV	SVD	ENSG00000138131	10	99017729	101017321	3594	0.599914	0.182196	0.166226	0.0504714	0.00119311	rs11189284	0.0012	0.00421,0.000772	rs4919231,rs12259756
KIAA1462	SKLM	IS	ENSG00000165757	10	29325616	31325032	5693	0.539295	0.246097	0.146556	0.066866	0.00118651	rs2768672	0.0012	5.44e-05,0.000366	rs2768672,rs10430570
PRKAR2B	LIV	CE	ENSG00000005249	7	105745093	107743409	3692	0.439607	0.409527	0.0774977	0.072183	0.00118542	rs192523939	0.0012	2.48e-05,0.00151	rs74620117,rs77209493
LOXL4	SF	CARDIoGRAMplusC4D	ENSG00000138131	10	99017729	101017321	3947	0.0640691	0.783783	0.0114118	0.139594	0.00114247	10:99157571	0.0011	4.4e-06,0.000135	10:99157571,10:100011077
CCDC71L	SF	CARDIoGRAMplusC4D_REC	ENSG00000253276	7	105299372	107298840	4282	0.164067	0.672244	0.0318909	0.130657	0.00114118	7:106241491	0.0011	1.47e-06,0.00195	7:106241491,7:106069830
KIAA1462	LIV	CE	ENSG00000165757	10	29325616	31325032	5705	0.129885	0.659665	0.0344344	0.174876	0.00114055	rs2462021	0.0011	6.26e-06,0.000438	rs2488016,rs406896
ADAMTS9	LIV	LAS	ENSG00000163638	3	63588304	65587494	4431	0.570517	0.221289	0.149198	0.0578589	0.0011363	rs9828000	0.0011	0.00303,0.00055	rs148242831,rs13100017
CCDC71L	SF	CE	ENSG00000253276	7	105299372	107298840	3921	0.177819	0.655143	0.0354191	0.130484	0.00113519	rs41813	0.0011	1.47e-06,0.000873	rs41813,rs2528897
KIAA1462	LIV	SVD	ENSG00000165757	10	29325616	31325032	5658	0.135232	0.686319	0.0291917	0.148141	0.00111737	rs2488016	0.0011	6.26e-06,0.000155	rs2488016,rs573188
KIAA1462	MAM	SVD	ENSG00000165757	10	29325616	31325032	5658	7.98e-31	0.821551	1.72e-31	0.177332	0.00111612	rs2478835	0.0011	3e-35,0.000155	rs9337951,rs573188
ADAMTS9	LIV	AS	ENSG00000163638	3	63588304	65587494	4429	0.554423	0.214902	0.165449	0.0641191	0.00110728	rs28546794	0.0011	0.00303,1.11e-05	rs148242831,rs28546794
ADAMTS9	MAM	CARDIoGRAMplusC4D_REC	ENSG00000163638	3	63588304	65587494	4875	7.01e-18	0.768308	2.1e-18	0.230605	0.00108682	3:64724632	0.0011	7.48e-24,3.46e-05	3:64724632,3:64795689
CCDC71L	Blood	CARDIoGRAMplusC4D_REC	ENSG00000253276	7	105299372	107298840	4282	0.612056	0.224303	0.11897	0.0435885	0.00108279	7:106677103	0.0011	0.00261,0.00195	7:105473360,7:106069830
CCDC71L	LIV	SVD	ENSG00000253276	7	105299372	107298840	3899	0.596962	0.248192	0.108621	0.0451494	0.00107548	rs80330319	0.0011	0.000477,0.000762	rs7796052,rs80330319
CCDC71L	SKLM	CARDIoGRAMplusC4D_REC	ENSG00000253276	7	105299372	107298840	4282	0.641008	0.19537	0.124597	0.0379648	0.0010606	7:106905000	0.0011	0.00608,0.00195	7:106261335,7:106069830
CCDC71L	LIV	CE	ENSG00000253276	7	105299372	107298840	3921	0.587464	0.245569	0.117015	0.0489033	0.00104917	rs2528897	0.001	0.000477,0.000873	rs7796052,rs2528897
PRKAR2B	SF	SVD	ENSG00000005249	7	105745093	107743409	3674	0.654116	0.179224	0.130017	0.0356137	0.00102839	rs80330319	0.001	0.00283,0.000762	rs2539830,rs80330319
CCDC71L	SF	AS	ENSG00000253276	7	105299372	107298840	3901	0.198155	0.72964	0.0152065	0.0559829	0.00101621	rs41813	0.001	1.47e-06,0.000689	rs41813,rs35301188
KIAA1462	AOR	SVD	ENSG00000165757	10	29325616	31325032	5658	4.3e-24	0.821636	9.29e-25	0.177352	0.00101284	rs2066334	0.001	7.63e-30,0.000155	rs2066334,rs573188
PRKAR2B	Blood	CARDIoGRAMplusC4D_REC	ENSG00000005249	7	105745093	107743409	4025	0.640467	0.20516	0.116171	0.0372027	0.000999694	7:106905000	0.001	0.0023,0.00195	7:106662841,7:106069830
KIAA1462	SKLM	SVD	ENSG00000165757	10	29325616	31325032	5658	0.564999	0.256647	0.121963	0.055391	0.000999454	rs573188	0.001	5.44e-05,0.000155	rs2768672,rs573188
PRKAR2B	SKLM	CARDIoGRAMplusC4D_REC	ENSG00000005249	7	105745093	107743409	4025	0.634715	0.210913	0.115127	0.0382463	0.000998513	7:105773504	0.001	0.000115,0.00195	7:105773504,7:106069830
PRKAR2B	Blood	SVD	ENSG00000005249	7	105745093	107743409	3674	0.646558	0.186827	0.128515	0.0371255	0.000974821	rs80330319	0.00097	0.00327,0.000762	rs1100418,rs80330319
LOXL4	SF	CE	ENSG00000138131	10	99017729	101017321	3603	0.074789	0.843428	0.00658286	0.074228	0.000971725	rs7916665	0.00097	7.06e-06,0.00316	rs7916665,rs74931036
CCDC71L	SKLM	CE	ENSG00000253276	7	105299372	107298840	3921	0.651301	0.18183	0.12973	0.0362086	0.000931357	rs2528897	0.00093	0.00608,0.000873	rs62484471,rs2528897
PRKAR2B	SF	CARDIoGRAMplusC4D_REC	ENSG00000005249	7	105745093	107743409	4025	0.650934	0.194752	0.118069	0.0353157	0.000928722	7:106170326	0.00093	0.00283,0.00195	7:106055635,7:106069830
CCDC71L	Blood	SVD	ENSG00000253276	7	105299372	107298840	3899	0.63364	0.211638	0.115295	0.0384997	0.000927641	rs80330319	0.00093	0.00261,0.000762	rs4292623,rs80330319
ADAMTS9	LIV	SVD	ENSG00000163638	3	63588304	65587494	4431	0.608031	0.235762	0.111906	0.0433822	0.000917557	rs3889648	0.00092	0.00303,0.000397	rs148242831,rs986150
CCDC71L	Blood	LAS	ENSG00000253276	7	105299372	107298840	3931	0.645144	0.217011	0.102472	0.0344601	0.00091211	rs17398575	0.00091	0.00261,0.000362	rs4292623,rs17398575
CCDC71L	LIV	LAS	ENSG00000253276	7	105299372	107298840	3931	0.607696	0.254462	0.0965239	0.0404086	0.000910082	rs17398575	0.00091	0.000477,0.000362	rs7796052,rs17398575
LOXL4	AOR	CE	ENSG00000138131	10	99017729	101017321	3603	0.00237684	0.915903	0.000209208	0.0806079	0.000902892	rs9420722	0.0009	5.12e-08,0.00316	rs9420722,rs74931036
CCDC71L	SF	CARDIoGRAMplusC4D	ENSG00000253276	7	105299372	107298840	4300	0.0441238	0.18086	0.151822	0.6223	0.000893125	7:107288677	0.00089	1.47e-06,6.26e-06	7:106241491,7:107259721
PRKAR2B	SF	CE	ENSG00000005249	7	105745093	107743409	3692	0.666015	0.183367	0.117411	0.0323166	0.000891012	rs78323145	0.00089	0.00283,0.00151	rs2539830,rs77209493
PRKAR2B	LIV	IS	ENSG00000005249	7	105745093	107743409	3674	0.480042	0.446157	0.0378036	0.0351264	0.000871678	rs35301188	0.00087	2.48e-05,0.000171	rs74620117,rs35301188
CCDC71L	SKLM	SVD	ENSG00000253276	7	105299372	107298840	3899	0.661736	0.183597	0.120407	0.033398	0.000861865	rs80330319	0.00086	0.00608,0.000762	rs62484471,rs80330319
PRKAR2B	Blood	CE	ENSG00000005249	7	105745093	107743409	3692	0.657829	0.191586	0.115968	0.0337659	0.000851598	rs112527862	0.00085	0.00327,0.00151	rs1100418,rs77209493
ADAMTS9	SKLM	CE	ENSG00000163638	3	63588304	65587494	4433	0.539247	0.324574	0.0844873	0.0508447	0.000846965	rs9877097	0.00085	0.000232,0.000286	rs62253780,rs9877097
ADAMTS9	LIV	CE	ENSG00000163638	3	63588304	65587494	4433	0.622304	0.241521	0.0975005	0.0378323	0.000841893	rs9877097	0.00084	0.00303,0.000286	rs148242831,rs9877097
ADAMTS9-AS1	AOR	CARDIoGRAMplusC4D_REC	ENSG00000241158	3	63561280	65561009	4871	8.18e-09	0.767421	2.47e-09	0.231739	0.000840087	3:64730121	0.00084	4.03e-15,3.46e-05	3:64730121,3:64795689
ADAMTS9	SKLM	IS	ENSG00000163638	3	63588304	65587494	4427	0.53561	0.321819	0.0885525	0.0531982	0.000820764	rs28546794	0.00082	0.000232,4.22e-05	rs62253780,rs28546794
CCDC71L	SF	IS	ENSG00000253276	7	105299372	107298840	3903	0.197552	0.727487	0.0158393	0.0583201	0.000801805	rs41813	0.0008	1.47e-06,0.000171	rs41813,rs35301188
ADAMTS9	AOR	CARDIoGRAMplusC4D_REC	ENSG00000163638	3	63588304	65587494	4875	2.4e-19	0.768532	7.2e-20	0.230676	0.000792113	3:64730121	0.00079	2.06e-25,3.46e-05	3:64730121,3:64795689
ADAMTS9	LIV	IS	ENSG00000163638	3	63588304	65587494	4427	0.617931	0.23953	0.102163	0.0395938	0.000782101	rs28546794	0.00078	0.00303,4.22e-05	rs148242831,rs28546794
PRKAR2B	SKLM	LAS	ENSG00000005249	7	105745093	107743409	3700	0.670072	0.202692	0.0971106	0.0293677	0.000757579	rs17398575	0.00076	0.000522,0.000362	rs2395858,rs17398575
PRKAR2B	SF	LAS	ENSG00000005249	7	105745093	107743409	3700	0.684042	0.188736	0.0991352	0.0273453	0.000741094	rs17398575	0.00074	0.00283,0.000362	rs2539830,rs17398575
PRKAR2B	LIV	AS	ENSG00000005249	7	105745093	107743409	3671	0.481991	0.447869	0.0359801	0.0334256	0.000734466	rs35301188	0.00073	2.48e-05,0.000689	rs74620117,rs35301188
ADAMTS9	MAM	CARDIoGRAMplusC4D	ENSG00000163638	3	63588304	65587494	4882	8.42e-18	0.92434	6.82e-19	0.074932	0.000728478	3:64724632	0.00073	7.48e-24,0.00141	3:64724632,3:63959704
ADAMTS9-AS1	SF	CARDIoGRAMplusC4D_REC	ENSG00000241158	3	63561280	65561009	4871	5.77e-05	0.767457	1.74e-05	0.231751	0.000716895	3:64546459	0.00072	2e-10,3.46e-05	3:64546459,3:64795689
PRKAR2B	AOR	CARDIoGRAMplusC4D	ENSG00000005249	7	105745093	107743409	4045	0.0179832	0.207293	0.0617873	0.71222	0.000715716	7:106410777	0.00072	6.12e-07,6.26e-06	7:106410777,7:107259721
ADAMTS9-AS1	AOR	CARDIoGRAMplusC4D	ENSG00000241158	3	63561280	65561009	4880	9.84e-09	0.924383	7.97e-10	0.0749099	0.000707325	3:64730121	0.00071	4.03e-15,0.00141	3:64730121,3:63959704
CCDC71L	SKLM	LAS	ENSG00000253276	7	105299372	107298840	3931	0.673757	0.188584	0.107017	0.0299469	0.000695083	rs17477177	0.0007	0.00608,0.000362	rs62484471,rs17398575
PRKAR2B	Blood	LAS	ENSG00000005249	7	105745093	107743409	3700	0.675512	0.197307	0.0978989	0.0285879	0.000694062	rs17398575	0.00069	0.00327,0.000362	rs1100418,rs17398575
ADAMTS9	AOR	CARDIoGRAMplusC4D	ENSG00000163638	3	63588304	65587494	4882	2.88e-19	0.924385	2.33e-20	0.0749362	0.000678766	3:64730121	0.00068	2.06e-25,0.00141	3:64730121,3:63959704
ADAMTS9-AS1	MAM	CARDIoGRAMplusC4D_REC	ENSG00000241158	3	63561280	65561009	4871	4.32e-12	0.767545	1.3e-12	0.231778	0.000676992	3:64704860	0.00068	4.89e-18,3.46e-05	3:64704891,3:64795689
LOXL4	MAM	LAS	ENSG00000138131	10	99017729	101017321	3600	0.686052	0.224558	0.0668756	0.0218834	0.000630996	rs147720392	0.00063	0.00114,0.00333	rs10786376,rs72835944
LOXL4	MAM	CE	ENSG00000138131	10	99017729	101017321	3603	0.691851	0.226677	0.0608961	0.0199456	0.000630121	rs10883109	0.00063	0.00114,0.00316	rs10786376,rs74931036
ADAMTS9-AS1	MAM	CARDIoGRAMplusC4D	ENSG00000241158	3	63561280	65561009	4880	5.2e-12	0.924459	4.21e-13	0.0749169	0.000624443	3:64704860	0.00062	4.89e-18,0.00141	3:64704891,3:63959704
PRKAR2B	SKLM	IS	ENSG00000005249	7	105745093	107743409	3674	0.712464	0.213989	0.0561069	0.0168458	0.000594559	rs35301188	0.00059	0.000522,0.000171	rs2395858,rs35301188
LOXL4	MAM	IS	ENSG00000138131	10	99017729	101017321	3596	0.710784	0.232417	0.0423763	0.0138507	0.000572895	rs56354111	0.00057	0.00114,0.00127	rs10786376,rs56354111
LOXL4	LIV	LAS	ENSG00000138131	10	99017729	101017321	3600	0.697997	0.212667	0.06804	0.0207249	0.000570726	rs12261952	0.00057	0.00421,0.00333	rs4919231,rs72835944
PRKAR2B	SKLM	AS	ENSG00000005249	7	105745093	107743409	3671	0.715352	0.214671	0.0534002	0.0160194	0.000558022	rs342267	0.00056	0.000522,0.000689	rs2395858,rs35301188
LOXL4	SF	IS	ENSG00000138131	10	99017729	101017321	3596	0.0768314	0.866385	0.00458062	0.0516475	0.000555573	rs11812223	0.00056	7.06e-06,0.00127	rs7916665,rs56354111
LOXL4	LIV	CE	ENSG00000138131	10	99017729	101017321	3603	0.703936	0.214695	0.0619598	0.018892	0.000517657	rs74931036	0.00052	0.00421,0.00316	rs4919231,rs74931036
LOXL4	SF	AS	ENSG00000138131	10	99017729	101017321	3598	0.0773849	0.872663	0.00402754	0.0454131	0.000511249	rs11812223	0.00051	7.06e-06,0.0011	rs7916665,rs56354111
CCDC71L	LIV	IS	ENSG00000253276	7	105299372	107298840	3903	0.653467	0.271849	0.0523934	0.0217912	0.000498535	rs35301188	0.0005	0.000477,0.000171	rs7796052,rs35301188
ADAMTS9-AS1	SF	CARDIoGRAMplusC4D	ENSG00000241158	3	63561280	65561009	4880	6.94e-05	0.92451	5.63e-06	0.0749223	0.000492718	3:64546459	0.00049	2e-10,0.00141	3:64546459,3:63959704
CCDC71L	Blood	AS	ENSG00000253276	7	105299372	107298840	3901	0.695777	0.232501	0.0533944	0.0178374	0.000490133	rs10276513	0.00049	0.00261,0.000689	rs4292623,rs35301188
CCDC71L	Blood	IS	ENSG00000253276	7	105299372	107298840	3903	0.693498	0.231829	0.055603	0.0185826	0.000487928	rs35301188	0.00049	0.00261,0.000171	rs4292623,rs35301188
CCDC71L	LIV	AS	ENSG00000253276	7	105299372	107298840	3901	0.655697	0.272587	0.0503187	0.0209137	0.0004838	rs35301188	0.00048	0.000477,0.000689	rs7796052,rs35301188
PRKAR2B	MAM	CARDIoGRAMplusC4D	ENSG00000005249	7	105745093	107743409	4045	0.00166011	0.223669	0.00570387	0.768489	0.000477633	7:106410777	0.00048	2.33e-08,6.26e-06	7:106410777,7:107259721
ADAMTS9	SKLM	CARDIoGRAMplusC4D	ENSG00000163638	3	63588304	65587494	4882	0.555028	0.369564	0.044998	0.0299572	0.000452832	3:63959704	0.00045	0.000232,0.00141	3:63713539,3:63959704
ADAMTS9-AS1	SF	IS	ENSG00000241158	3	63561280	65561009	4423	7.38e-05	0.858124	1.22e-05	0.14134	0.000450209	rs7615657	0.00045	2e-10,4.22e-05	rs7615657,rs28546794
PRKAR2B	SF	IS	ENSG00000005249	7	105745093	107743409	3674	0.727297	0.199307	0.0572751	0.0156913	0.000429624	rs35301188	0.00043	0.00283,0.000171	rs2539830,rs35301188
LOXL4	MAM	AS	ENSG00000138131	10	99017729	101017321	3598	0.71591	0.234216	0.0372599	0.0121856	0.000427893	rs56354111	0.00043	0.00114,0.0011	rs10786376,rs56354111
ADAMTS9-AS1	SF	AS	ENSG00000241158	3	63561280	65561009	4425	6.63e-05	0.77018	1.97e-05	0.229321	0.000413144	rs7615657	0.00041	2e-10,1.11e-05	rs7615657,rs28546794
CCDC71L	SKLM	AS	ENSG00000253276	7	105299372	107298840	3901	0.726621	0.201737	0.0557614	0.0154775	0.000402882	rs77004591	0.0004	0.00608,0.000689	rs62484471,rs35301188
PRKAR2B	Blood	IS	ENSG00000005249	7	105745093	107743409	3674	0.718902	0.207729	0.0566139	0.0163548	0.000400359	rs35301188	0.0004	0.00327,0.000171	rs1100418,rs35301188
CCDC71L	AOR	CARDIoGRAMplusC4D	ENSG00000253276	7	105299372	107298840	4300	1.46e-33	0.225095	5.03e-33	0.774508	0.000397074	7:106410777	0.0004	2.37e-37,6.26e-06	7:106410777,7:107259721
PRKAR2B	Blood	AS	ENSG00000005249	7	105745093	107743409	3671	0.721811	0.208363	0.0538824	0.0155501	0.000393759	rs35301188	0.00039	0.00327,0.000689	rs1100418,rs35301188
CCDC71L	SKLM	IS	ENSG00000253276	7	105299372	107298840	3903	0.724225	0.201188	0.0580666	0.0161268	0.000393581	rs35301188	0.00039	0.00608,0.000171	rs62484471,rs35301188
PRKAR2B	SF	AS	ENSG00000005249	7	105745093	107743409	3671	0.730217	0.199965	0.0545099	0.0149234	0.000384528	rs35301188	0.00038	0.00283,0.000689	rs2539830,rs35301188
LOXL4	LIV	IS	ENSG00000138131	10	99017729	101017321	3596	0.723375	0.220011	0.0431269	0.0131131	0.000373741	rs56354111	0.00037	0.00421,0.00127	rs4919231,rs56354111
CCDC71L	MAM	CARDIoGRAMplusC4D	ENSG00000253276	7	105299372	107298840	4300	3.33e-29	0.225101	1.15e-28	0.774529	0.000370714	7:106410777	0.00037	1.17e-33,6.26e-06	7:106410777,7:107259721
LOXL4	LIV	AS	ENSG00000138131	10	99017729	101017321	3598	0.728542	0.221692	0.0379173	0.011535	0.000313673	rs56354111	0.00031	0.00421,0.0011	rs4919231,rs56354111
