# Supplementary material for: GWAS and colocalization analyses implicate carotid intima-media thickness and carotid plaque loci in cardiovascular outcomes
Source: Nat Commun. 2018 Dec 3;9:5141. doi: 10.1038/s41467-018-07340-5 (PMC6277418; doi:10.1038/s41467-018-07340-5)
Supplement: Supplementary file 4 — Supplementary Data 2 [file 41467_2018_7340_MOESM4_ESM.xlsx]

## Sheet: Supplementary Data 2
Supplementary DATA 2. GO Slim analysis for protein-coding genes identified in GWAS meta-analyses (Tables 1 and S5) of cIMT (A); plaque (B) and genes identified in co-localization of cIMT/plaque GWAS and tissue eQTLs (C; Table 2) or in co-localization of 3 traits; cIMT/plaque (trait1), eQTL in MAM/AOR (trait2), together with CHD/stroke (trait3) (D)
The black boxes indicate the association of the gene with the GO term or one of its descendents, e.g. 'developmental process' includes genes associated with 'blood vessel development' or 'heart development'.
A
Location relative to SNP	Gene Symbol	UniProt Acc.	Set	SNP	Chromosome	biological_process	cardiovascular system development	cell adhesion	developmental process	gene expression	immune system process	inflammatory response	ion transport	lipid metabolic process	lipid transport	lipoprotein metabolic process	signaling	vesicle-mediated transport	Count of GO categories per protein
Nearest	VTI1A	Q96AJ9	cIMT	rs11196033	chr10: 114,410,998	1												1	2
Nearest	SGK223	Q86YV5	cIMT	rs11785239	chr8:8,205,010	1											1		2
Nearest	PIK3CG	P48736	cIMT	rs13225723	chr7:106,416,467	1	1	1			1	1	1	1			1	1	9
Nearest	ATG4B	Q9Y4P1	cIMT	rs139302128	Chr2: 242,594,226	1										1			2
LD	FARP2	O94887	cIMT	rs139302128	Chr2: 242,594,226	1		1	1		1						1		5
LD	ING5	Q8WYH8	cIMT	rs139302128	Chr2: 242,594,226	1				1							1		3
LD	PDCD1	Q15116	cIMT	rs139302128	Chr2: 242,594,226	1		1	1		1								4
LD	SEPT2	Q15019	cIMT	rs139302128	Chr2: 242,594,226	1			1								1		3
LD	AGXT	P21549	cIMT	rs139302128	Chr2: 242,594,226	1							1				1		3
LD	ANO7	Q6IWH7	cIMT	rs139302128	Chr2: 242,594,226	1							1		1				3
LD	BOK	Q9UMX3	cIMT	rs139302128	Chr2: 242,594,226	1			1								1		3
LD	HDLBP	Q00341	cIMT	rs139302128	Chr2: 242,594,226	1								1	1				3
LD	DTYMK	P23919	cIMT	rs139302128	Chr2: 242,594,226	1			1										2
LD	MTERF4	Q7Z6M4	cIMT	rs139302128	Chr2: 242,594,226	1			1	1									3
LD	PASK	Q96RG2	cIMT	rs139302128	Chr2: 242,594,226	1				1							1		3
LD	STK25	O00506	cIMT	rs139302128	Chr2: 242,594,226	1			1								1		3
LD	GAL3ST2	Q9H3Q3	cIMT	rs139302128	Chr2: 242,594,226	1								1					2
LD	NEU4	Q8WWR8	cIMT	rs139302128	Chr2: 242,594,226	1								1					2
LD	CB054	Q08AI8	cIMT	rs139302128	Chr2: 242,594,226														0
LD	CRCC2	H7BZ55	cIMT	rs139302128	Chr2: 242,594,226														0
LD	CXXC11	Q14D33	cIMT	rs139302128	Chr2: 242,594,226	1													1
LD	D2HGDH	Q8N465	cIMT	rs139302128	Chr2: 242,594,226	1													1
LD	KIF1A	Q12756	cIMT	rs139302128	Chr2: 242,594,226	1			1										2
LD	PPP1R7	Q15435	cIMT	rs139302128	Chr2: 242,594,226	1													1
LD	SNED1	Q8TER0	cIMT	rs139302128	Chr2: 242,594,226			1											1
LD	THAP4	Q8WY91	cIMT	rs139302128	Chr2: 242,594,226					1									1
LD	HCG1777198	Q9P1C0	cIMT	rs139302128	Chr2: 242,594,226														0
Nearest	ZHX2	Q9Y6X8	cIMT	rs148147734	chr8: 123,401,537	1			1	1									3
Nearest	SOX7	Q9BT81	cIMT	rs200482500	chr8: 10,606,223	1			1	1							1		4
Nearest	PINX1	Q96BK5	cIMT	rs200482500	chr8: 10,606,223	1													1
LD	uncharacterized protein	A0A0A6YYK5	cIMT	rs200482500	chr8: 10,606,223														0
LD	CH074	Q6P047	cIMT	rs200482500	chr8: 10,606,223														0
Nearest	ATG10	Q9H0Y0	cIMT	rs224904	chr5:8,163,7916	1										1	1		3
Nearest	ATP6AP1L	Q52LC2	cIMT	rs224904	chr5:8,163,7916								1						1
LD	RPS23	P62266	cIMT	rs224904	chr5:8,163,7916	1				1									2
Nearest	MCPH1	Q8NEM0	cIMT	rs2912063	chr8: 6,486,033	1			1	1		1							4
Nearest	ANGPT2	O15123	cIMT	rs2912063	chr8: 6,486,033	1	1	1	1		1						1		6
Nearest	APOB	P04114	cIMT	rs515135	chr2:21,286,057	1	1		1	1	1			1	1	1	1	1	10
LD	TDRD15	B5MCY1	cIMT	rs515135	chr2:21,286,057														0
Nearest	AIG1	Q9NVV5	cIMT	rs6907215	chr6:143,608,968									1					1
Nearest	APOE	P02649	cIMT	rs7412	chr19: 45,412,079	1	1		1	1		1	1	1	1	1	1	1	11
LD	APOC1	P02654	cIMT	rs7412	chr19: 45,412,079	1							1	1	1	1		1	6
LD	NECTIN2	Q92692	cIMT	rs7412	chr19: 45,412,079	1		1	1		1						1		5
LD	TOMM40	O96008	cIMT	rs7412	chr19: 45,412,079	1							1						2
Nearest	CBFA2T3	O75081	cIMT	rs844396	chr16:88,966,667	1			1	1	1								4
Count of proteins per GO category						35	4	6	16	11	7	3	7	8	5	5	15	5
B
Location relative to SNP	Gene Symbol	UniProt Acc.	Set	SNP	Chromosome	biological_process	cardiovascular system development	cell adhesion	developmental process	gene expression	immune system process	inflammatory response	ion transport	lipid metabolic process	lipid transport	lipoprotein metabolic process	signaling	vesicle-mediated transport	Count of GO categories per protein
Nearest	PIK3CG	P48736	Plaque	rs17477177	chr7:106411858	1	1	1			1	1	1	1			1	1	9
Nearest	TMEM170A	Q8WVE7	Plaque	rs113309773	chr16:75432686:INDEL	1													1
Nearest	CFDP1	Q9UEE9	Plaque	rs113309773	chr16:75432686:INDEL	1		1	1										3
Nearest	LDLR	P01130	Plaque	rs200495339	chr19:11189298	1			1	1	1	1	1	1	1	1		1	10
LD	SMARCA4	P51532	Plaque	rs200495339	chr19:11189298	1			1	1							1		4
Nearest	EDNRA	P25101	Plaque	rs11413744	chr4:148395284:INDEL	1	1		1								1		4
Nearest	TMCO5B	A8MYB1	Plaque	rs4779614	chr15:33540117														0
Count of proteins per GO category						6	2	2	4	2	2	2	2	2	1	1	3	2
C
Gene Symbol	UniProt Acc.	Set	SNP	Chromosome	biological_process	cardiovascular system development	cell adhesion	developmental process	gene expression	immune system process	inflammatory response	ion transport	lipid metabolic process	lipid transport	lipoprotein metabolic process	signaling	vesicle-mediated transport	Count of GO categories per protein
CCDC71L	Q8N9Z2	cIMT/Plaque	rs12705390	chr7:106,416,467				1					1					2
PRKAR2B	P31323	cIMT/Plaque	rs12705390	chr7:105,299,372	1								1			1		3
ADAMTS9	Q9P2N4	cIMT	rs17676309	chr3:63,561,280	1	1	1	1									1	5
LOXL4	Q96JB6	cIMT	rs55917128	chr10:99,017,729	1												1	2
D
Gene Symbol	UniProt Acc.	Set	Chromosome	biological_process	cardiovascular system development	cell adhesion	developmental process	gene expression	immune system process	inflammatory response	ion transport	lipid metabolic process	lipid transport	lipoprotein metabolic process	signaling	vesicle-mediated transport	Count of GO categories per protein
ADAMTS9	Q9P2N4	cIMT	chr3:63,588,304	1	1	1	1									1	5
CHD13	P55290	cIMT	chr16:82,245,780	1	1	1		1							1	1	6
KIAA1462	Q9P266	cIMT/Plaque	chr10:29,325,616		1	1									1		3
CCDC71L	Q8N9Z2	cIMT/Plaque	chr7:105,299,372				1					1					2
PRKAR2B	P31323	cIMT/Plaque	chr7:105,745,093	1								1			1		3
TWIST1	Q15672	Plaque	chr7:18,157,302	1	1		1	1			1	1			1		7
EDNRA	P25101	Plaque	chr4:147,434,590	1	1		1								1		4
